# Supplementary material for: A multi-responsive luminescent sensor for organic small-molecule pollutants and metal ions based on a 4d–4f metal–organic framework
Source: Royal Society of Chemistry journal article supplement (doi:10.1039/c7dt00159b), 2017-01-01
Supplement: c7dt00159b1.pdf [file c7dt00159b1.pdf]

# Electronic Supporting Information

## for

### A Multi-Responsive Luminescent Sensor for Organic Small-Molecule Pollutants and Metal Ions Based on a 4d-4f Metal-Organic Framework

Huili Ma<sup>a</sup>, Lu Wang<sup>a</sup>, Jinghuo Chen<sup>a</sup>, Xuejing Zhang<sup>a</sup>, Liang Wang,<sup>\*b</sup> Na Xu<sup>\*a</sup>, Guangming Yang<sup>\*a</sup> and Peng Cheng<sup>a,c</sup>

*Department of Chemistry, Key Laboratory of Advanced Energy Materials Chemistry (MOE), Nankai University, Tianjin 300071, China. E-mail: naxu@nankai.edu.cn*

*State Key Laboratory of Separation Membranes and Membrane Processes, Tianjin Polytechnic University, Tianjin 300387, China. E-mail: mashi7822@163.com*

*State Key Laboratory of Elemento-Organic Chemistry, Nankai University, Tianjin 300071, China*

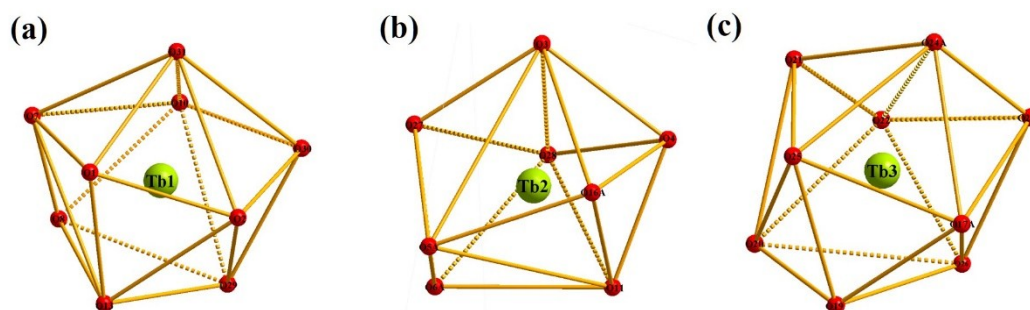

Fig. S1 Coordination polyhedron around Tb<sup>3+</sup> ions in HMOF 1.

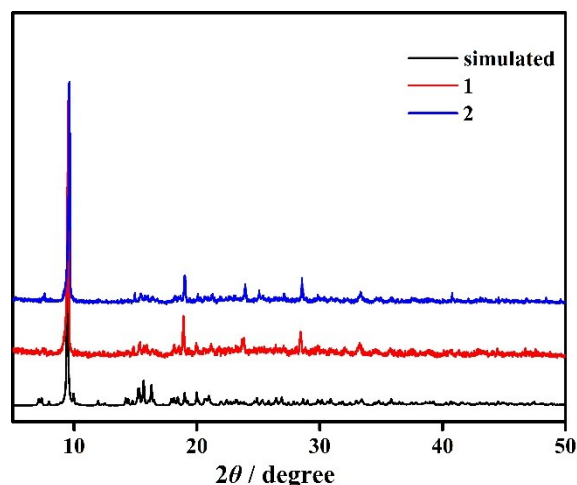

Fig. S2 Simulated and experimental PXRD patterns of HMOFs 1 and 2.

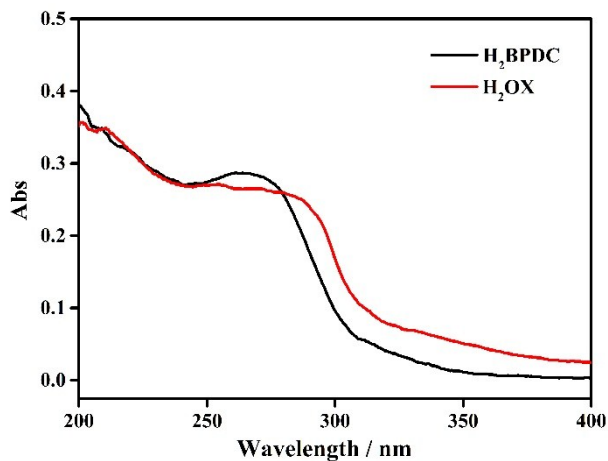

**Fig. S3** UV-vis spectra of H<sub>2</sub>BPDC and H<sub>2</sub>OX.

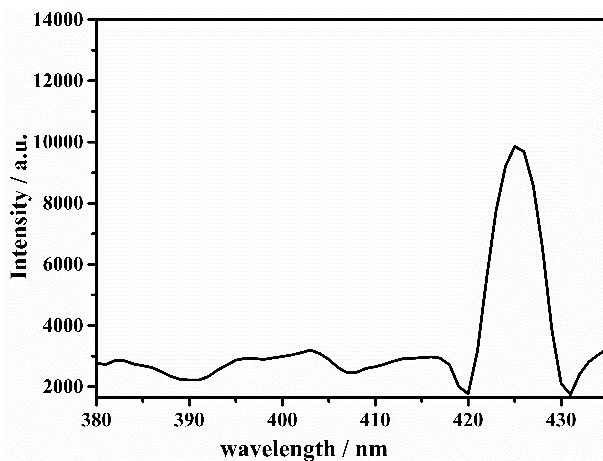

**Fig. S4** The phosphorescence spectrum of HMOF 2 (Gd-MOF) at 77K.

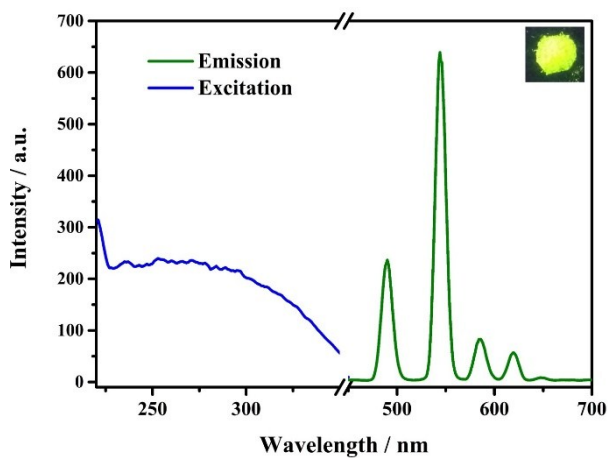

**Fig. S5** The solid-state excitation spectrum and emission spectrum with the excitation wavelength of 290 nm for HMOF 1 at room temperature.

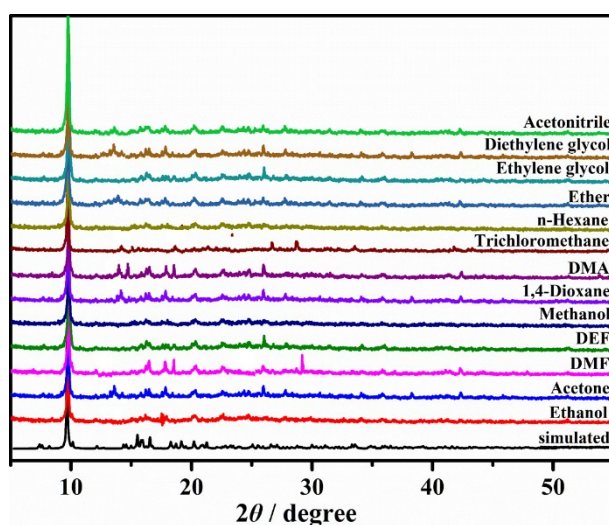

Fig. S6 PXRD patterns of HMOF 1 after immersing in different solvents for 24 hours.

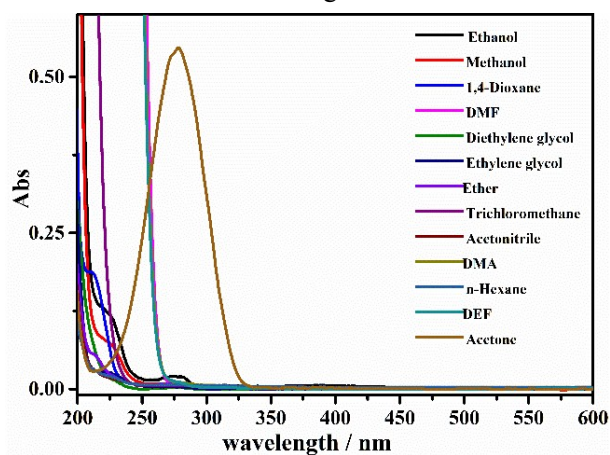

Fig. S7 UV-vis spectra of different solvents.

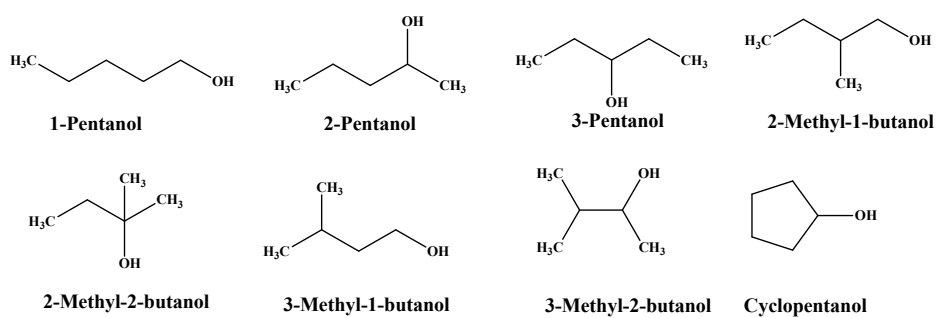

Fig. S8 Eight kinds of alcohols isomers of  $C_5H_{12}O$ .

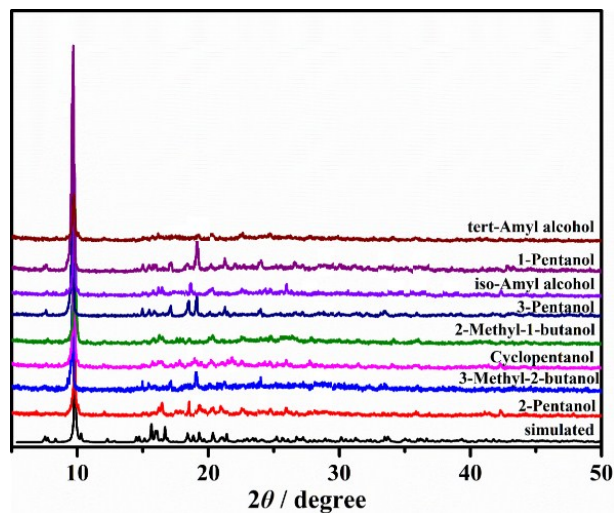

Fig. S9 PXRD of HMOF 1 after immersing in different  $C_5H_{12}O$  isomers.

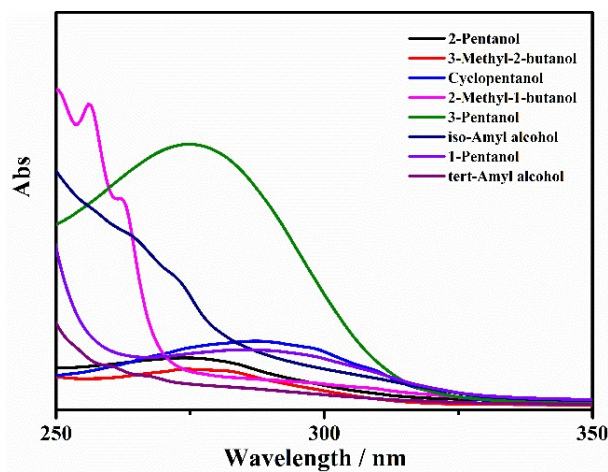

Fig. S10 UV-vis spectra of  $C_5H_{12}O$  isomers.

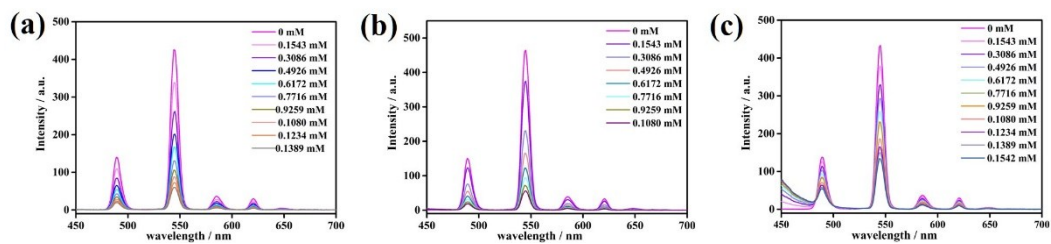

Fig. S11 Emission spectra of HMOF 1 with the addition of 1,3-benzendiamine (a), 1,2-benzendiamine (b) and 1,4-benzendiamine (c) in ethanol.

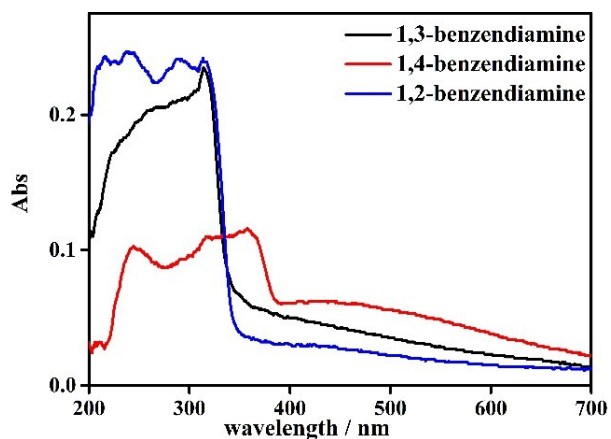

Fig. S12 UV-vis spectra of 1,2-benzendiamine, 1,3-benzendiamine and 1,4-benzendiamine.

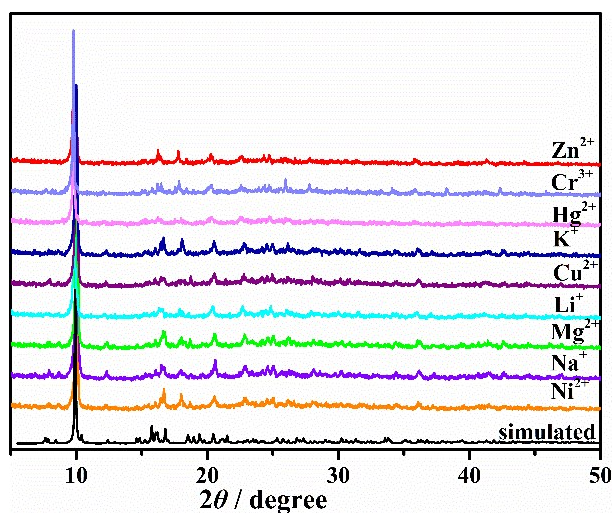

Fig. S13 PXRD of HMOF 1 after immersing in different solutions containing various metal ions.

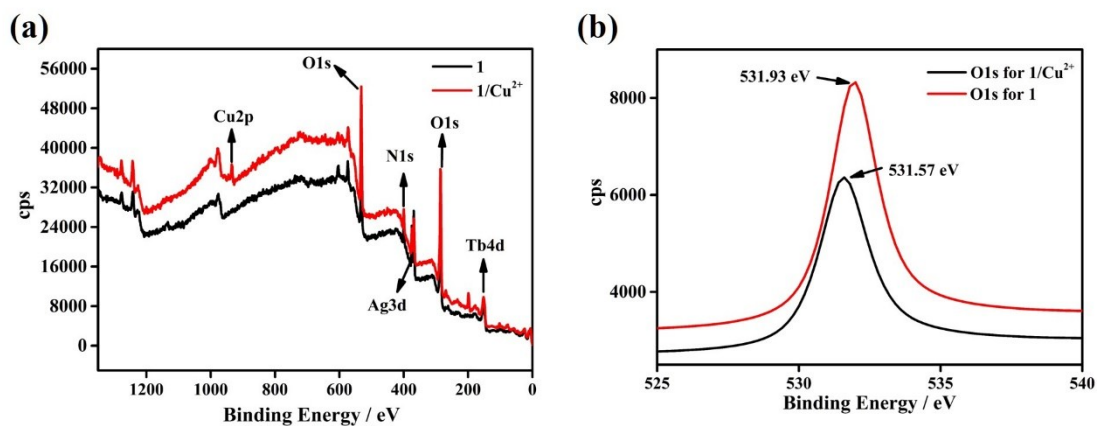

Fig. S14 (a) XPS for HMOF 1 and 1/Cu<sup>2+</sup> and (b) O1s XPS for HMOF 1 and 1/Cu<sup>2+</sup>.

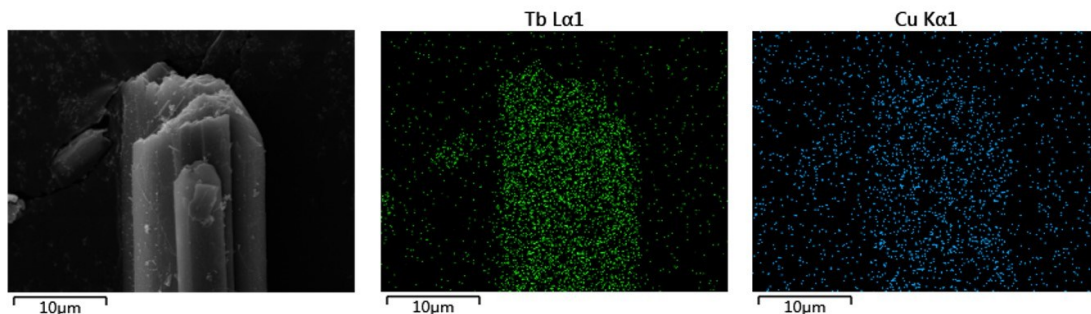

**Fig. S15** SEM image of  $1/\text{Cu}^{2+}$  (left) and the corresponding elemental distributions of  $\text{Tb}^{3+}$  (middle) and  $\text{Cu}^{2+}$  (right).

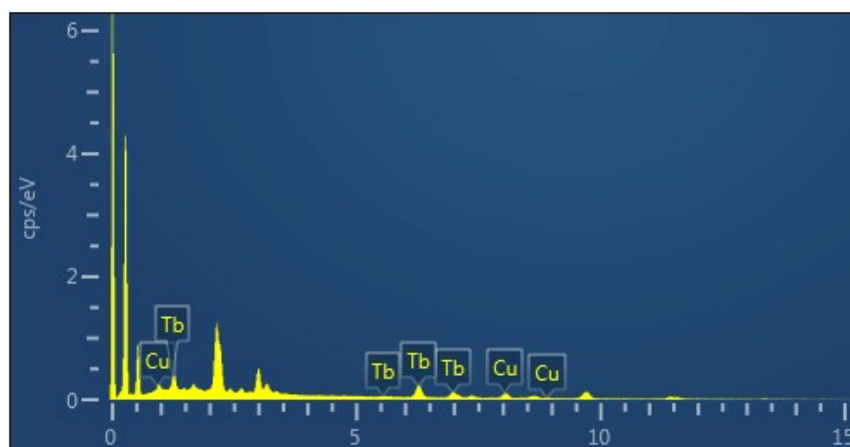

**Fig. S16** The EDS of the solid sample of  $1/\text{Cu}^{2+}$ .

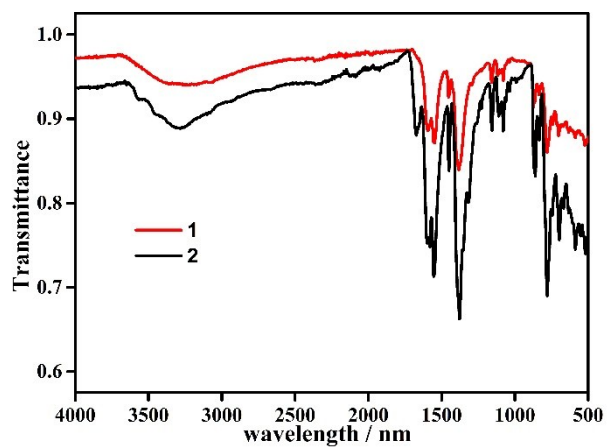

**Fig. S17** FT-IR spectra of HMOFs **1** and **2**.

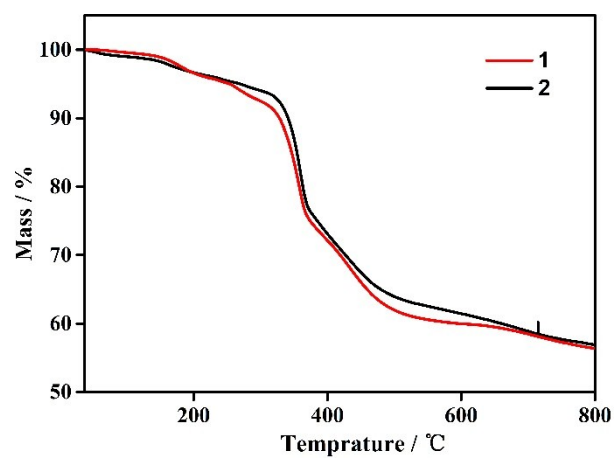

**Fig. S18** The TGA of HMOFs 1 and 2.

Table S1 Crystal Data and Structural Refinement Parameters for HMOFs **1** and **2**

|                                               | HMOF <b>1</b>                                                                                   | HMOF <b>2</b>                                                                                   |
|-----------------------------------------------|-------------------------------------------------------------------------------------------------|-------------------------------------------------------------------------------------------------|
| formula                                       | C <sub>62</sub> H <sub>58</sub> Ag <sub>3</sub> Tb <sub>3</sub> N <sub>10</sub> O <sub>38</sub> | C <sub>62</sub> H <sub>58</sub> Ag <sub>3</sub> Gd <sub>3</sub> N <sub>10</sub> O <sub>38</sub> |
| fw                                            | 2351.44                                                                                         | 2346.43                                                                                         |
| $\lambda$ / Å                                 | 0.71073                                                                                         | 0.71073                                                                                         |
| crystal system                                | triclinic                                                                                       | triclinic                                                                                       |
| space group                                   | $P\bar{1}$                                                                                      | $P\bar{1}$                                                                                      |
| $a$ (Å)                                       | 12.69(4)                                                                                        | 12.69(3)                                                                                        |
| $b$ (Å)                                       | 12.97(4)                                                                                        | 12.95(3)                                                                                        |
| $c$ (Å)                                       | 23.51(7)                                                                                        | 23.50(6)                                                                                        |
| $\alpha$ (deg)                                | 104.00(10)                                                                                      | 103.97(4)                                                                                       |
| $\beta$ (deg)                                 | 102.15(10)                                                                                      | 101.91(5)                                                                                       |
| $\gamma$ (deg)                                | 91.67(10)                                                                                       | 91.81(3)                                                                                        |
| $V$ / Å <sup>3</sup>                          | 3659.89(2)                                                                                      | 3653.7(14)                                                                                      |
| $Z$                                           | 2                                                                                               | 2                                                                                               |
| $\rho_{\text{calc}}$ / mg mm <sup>-3</sup>    | 2.019                                                                                           | 2.018                                                                                           |
| $\mu$ / mm <sup>-1</sup>                      | 3.739                                                                                           | 3.565                                                                                           |
| reflns collected / unique                     | 56122                                                                                           | 29820                                                                                           |
| $R(\text{int})$                               | 0.0759                                                                                          | 0.0658                                                                                          |
| $2\theta$ range / deg                         | 5.682 to 50.018                                                                                 | 6.04 to 50.02                                                                                   |
| $F(000)$                                      | 2140.0                                                                                          | 2134.0                                                                                          |
| GOF on $F^2$                                  | 1.045                                                                                           | 0.918                                                                                           |
| $R_1 / wR_2 [I > 2\sigma(I)]$                 | 0.0426 / 0.0876                                                                                 | 0.0471 / 0.1114                                                                                 |
| $R_1 / wR_2$ (all data)                       | 0.0656 / 0.0944                                                                                 | 0.0638 / 0.1187                                                                                 |
| largest diff. peak / hole / e Å <sup>-3</sup> | 1.70 / -2.05                                                                                    | 2.86 / -1.84                                                                                    |



Table S2 Selected bond lengths (Å) and angles (°) for HMOF 1

| HMOF 1               |          |                                        |            |                                        |            |
|----------------------|----------|----------------------------------------|------------|----------------------------------------|------------|
| Tb1-O25              | 2.438(5) | O25-Tb1-O27                            | 144.22(16) | O24 <sup>3</sup> -Tb2-O29              | 79.47(19)  |
| Tb1-O27              | 2.449(5) | O25-Tb1-O4                             | 71.53(16)  | O5 <sup>1</sup> -Tb2-O12               | 108.1(2)   |
| Tb1-O4               | 2.467(5) | O25-Tb1-O10                            | 131.98(16) | O5 <sup>1</sup> -Tb2-O24 <sup>3</sup>  | 69.11(18)  |
| Tb1-O10              | 2.555(5) | O25-Tb1-O9                             | 80.58(17)  | O5 <sup>1</sup> -Tb2-O13               | 90.6(3)    |
| Tb1-O21              | 2.413(5) | O25-Tb1-O26                            | 71.62(16)  | O5 <sup>1</sup> -Tb2-O11               | 79.29(18)  |
| Tb1-O9               | 2.492(5) | O25-Tb1-O22                            | 134.09(16) | O5 <sup>1</sup> -Tb2-O23 <sup>3</sup>  | 130.1(2)   |
| Tb1-O26              | 2.471(5) | O27-Tb1-O4                             | 136.20(17) | O5 <sup>1</sup> -Tb2-O29               | 75.4(2)    |
| Tb1-O7               | 2.395(5) | O27-Tb1-O10                            | 75.23(16)  | O5 <sup>1</sup> -Tb2-O28               | 139.3(2)   |
| Tb1-O22              | 2.516(5) | O27-Tb1-O9                             | 125.21(16) | O1 <sup>3</sup> -Tb2-O12               | 78.51(19)  |
| Tb2-O12              | 2.501(5) | O27-Tb1-O26                            | 72.80(16)  | O1 <sup>3</sup> -Tb2-O24 <sup>3</sup>  | 69.98(19)  |
| Tb2-O24 <sup>3</sup> | 2.423(5) | O27-Tb1-O22                            | 70.27(16)  | O1 <sup>3</sup> -Tb2-O11               | 121.9(2)   |
| Tb2-O5 <sup>2</sup>  | 2.330(6) | O4-Tb1-O10                             | 96.30(16)  | O1 <sup>3</sup> -Tb2-O23 <sup>3</sup>  | 94.8(2)    |
| Tb2-O1 <sup>3</sup>  | 2.337(6) | O4-Tb1-O9                              | 70.80(17)  | O1 <sup>3</sup> -Tb2-O29               | 149.3(2)   |
| Tb2-O11              | 2.502(5) | O4-Tb1-O26                             | 126.49(17) | O1 <sup>3</sup> -Tb2-O28               | 127.2(3)   |
| Tb2-O23 <sup>3</sup> | 2.462(5) | O4-Tb1-O22                             | 66.37(17)  | O23 <sup>3</sup> -Tb2-O12              | 121.65(18) |
| Tb2-O29              | 2.457(6) | O21-Tb1-O25                            | 87.08(16)  | O23 <sup>3</sup> -Tb2-O11              | 134.59(16) |
| Tb2-O28              | 2.402(6) | O21-Tb1-O27                            | 81.35(16)  | O29-Tb2-O12                            | 131.60(19) |
| Tb3-O31              | 2.424(5) | O21-Tb1-O4                             | 75.88(17)  | O29-Tb2-O11                            | 82.76(19)  |
| Tb3-O18 <sup>1</sup> | 2.415(4) | O21-Tb1-O10                            | 136.16(15) | O29-Tb2-O23 <sup>3</sup>               | 75.12(18)  |
| Tb3-O30              | 2.363(5) | O21-Tb1-O9                             | 146.61(16) | O28-Tb2-O12                            | 71.2(2)    |
| Tb3-O19              | 2.417(5) | O21-Tb1-O26                            | 64.83(16)  | O28-Tb2-O24 <sup>3</sup>               | 132.5(2)   |
| Tb3-O14 <sup>2</sup> | 2.409(4) | O21-Tb1-O22                            | 65.94(16)  | O28-Tb2-O11                            | 68.52(18)  |
| Tb3-O13 <sup>2</sup> | 2.526(5) | O9-Tb1-O10                             | 52.04(16)  | O28-Tb2-O23 <sup>3</sup>               | 67.98(18)  |
| Tb3-O20              | 2.620(5) | O9-Tb1-O22                             | 101.56(17) | O28-Tb2-O29                            | 76.5(3)    |
| Tb3-O15 <sup>1</sup> | 2.451(5) | O26-Tb1-O10                            | 137.20(16) | O31-Tb3-O13 <sup>1</sup>               | 127.23(15) |
| Tb3-O16 <sup>1</sup> | 2.578(5) | O26-Tb1-O9                             | 136.97(16) | O31-Tb3-O20                            | 88.31(17)  |
| Ag1-N4 <sup>4</sup>  | 2.233(6) | O26-Tb1-O22                            | 121.41(16) | O31-Tb3-O15 <sup>2</sup>               | 122.50(18) |
| Ag1-N2               | 2.409(6) | O7-Tb1-O25                             | 86.50(16)  | O31-Tb3-O16 <sup>2</sup>               | 71.03(17)  |
| Ag1-N10 <sup>5</sup> | 2.558(6) | O7-Tb1-O27                             | 78.74(16)  | O18 <sup>2</sup> -Tb3-O31              | 81.55(16)  |
| Ag1-N1               | 2.272(6) | O7-Tb1-O4                              | 141.48(17) | O18 <sup>2</sup> -Tb3-O19              | 71.67(16)  |
| Ag2-N7               | 2.255(6) | O7-Tb1-O10                             | 75.01(16)  | O18 <sup>2</sup> -Tb3-O13 <sup>1</sup> | 148.75(15) |
| Ag2-N3               | 2.243(6) | O7-Tb1-O21                             | 135.60(16) | O18 <sup>2</sup> -Tb3-O20              | 122.92(15) |
| Ag2-N5               | 2.235(6) | O7-Tb1-O9                              | 74.73(16)  | O18 <sup>2</sup> -Tb3-O15 <sup>2</sup> | 82.31(16)  |
| Ag3-N6               | 2.246(6) | O7-Tb1-O26                             | 71.46(16)  | O18 <sup>2</sup> -Tb3-O16 <sup>2</sup> | 69.45(15)  |
| Ag3-N8               | 2.217(6) | O7-Tb1-O22                             | 138.82(16) | O30-Tb3-O31                            | 144.42(17) |
| Ag3-N9               | 2.280(6) | O22-Tb1-O10                            | 71.40(15)  | O30-Tb3-O18 <sup>2</sup>               | 78.41(16)  |
|                      |          | O12-Tb2-O11                            | 52.37(16)  | O30-Tb3-O19                            | 74.25(17)  |
|                      |          | O24 <sup>3</sup> -Tb2-O12              | 148.22(17) | O30-Tb3-O14 <sup>1</sup>               | 132.81(16) |
|                      |          | O24 <sup>3</sup> -Tb2-O11              | 146.71(16) | O30-Tb3-O13 <sup>1</sup>               | 81.27(16)  |
|                      |          | O24 <sup>3</sup> -Tb2-O23 <sup>3</sup> | 66.51(16)  | O30-Tb3-O20                            | 78.54(16)  |
|                      |          | O30-Tb3-O15 <sup>2</sup>               | 83.53(18)  | O30-Tb3-O16 <sup>2</sup>               | 126.68(16) |

|                                        |            |                                        |            |           |          |
|----------------------------------------|------------|----------------------------------------|------------|-----------|----------|
| O19-Tb3-O31                            | 71.66(17)  | O13 <sup>1</sup> -Tb3-O16 <sup>2</sup> | 105.59(16) | N5-Ag2-N3 | 123.0(2) |
| O19-Tb3-O13 <sup>1</sup>               | 124.65(16) | O15 <sup>2</sup> -Tb3-O13 <sup>1</sup> | 71.99(17)  | N6-Ag3-N9 | 106.9(2) |
| O19-Tb3-O20                            | 51.97(15)  | O15 <sup>2</sup> -Tb3-O20              | 144.45(16) | N8-Ag3-N6 | 125.6(2) |
| O19-Tb3-O15 <sup>2</sup>               | 148.49(17) | O15 <sup>2</sup> -Tb3-O16 <sup>2</sup> | 51.62(16)  | N8-Ag3-N9 | 123.8(2) |
| O19-Tb3-O16 <sup>2</sup>               | 128.93(16) | O16 <sup>2</sup> -Tb3-O20              | 154.77(15) |           |          |
| O14 <sup>1</sup> -Tb3-O31              | 74.76(16)  | N4 <sup>4</sup> -Ag1-N2                | 139.9(2)   |           |          |
| O14 <sup>1</sup> -Tb3-O18 <sup>2</sup> | 147.64(16) | N4 <sup>4</sup> -Ag1-N10 <sup>5</sup>  | 89.5(2)    |           |          |
| O14 <sup>1</sup> -Tb3-O19              | 119.45(16) | N4 <sup>4</sup> -Ag1-N1                | 134.5(2)   |           |          |
| O14 <sup>1</sup> -Tb3-O13 <sup>1</sup> | 53.12(15)  | N2-Ag1-N10 <sup>5</sup>                | 85.4(2)    |           |          |
| O14 <sup>1</sup> -Tb3-O20              | 78.55(16)  | N1-Ag1-N2                              | 71.1(2)    |           |          |
| O14 <sup>1</sup> -Tb3-O15 <sup>2</sup> | 92.04(17)  | N1-Ag1-N10 <sup>5</sup>                | 132.7(2)   |           |          |
| O14 <sup>1</sup> -Tb3-O16 <sup>2</sup> | 82.05(16)  | N3-Ag2-N7                              | 111.9(2)   |           |          |
| O13 <sup>1</sup> -Tb3-O20              | 75.10(15)  | N5-Ag2-N7                              | 122.0(2)   |           |          |

Symmetry transformations used to generate equivalent atoms: <sup>1</sup>+X,1+Y,+Z; <sup>2</sup>-1-X,2-Y,-Z; <sup>3</sup>1-X,2-Y,1-Z; <sup>4</sup>-X,1-Y,1-Z; <sup>5</sup>-X,2-Y,1-Z; <sup>6</sup>+X,-1+Y,+Z

Table S3 Selected bond lengths (Å) and angles (°) for HMOF 2

| HMOF 2               |          |                                        |            |                                        |            |
|----------------------|----------|----------------------------------------|------------|----------------------------------------|------------|
| Gd1-O12 <sup>1</sup> | 2.478(5) | O12 <sup>1</sup> -Gd1-O11 <sup>1</sup> | 52.20(17)  | O7-Gd3-O13                             | 69.17(17)  |
| Gd1-O1 <sup>2</sup>  | 2.455(5) | O12 <sup>1</sup> -Gd1-O23              | 102.07(18) | O25-Gd3-O14                            | 123.26(18) |
| Gd1-O31              | 2.426(5) | O12 <sup>1</sup> -Gd1-O30              | 136.56(18) | O25-Gd3-O5 <sup>3</sup>                | 87.13(18)  |
| Gd1-O11 <sup>1</sup> | 2.540(5) | O12-Gd1-O12 <sup>1</sup>               | 70.74(17)  | O25-Gd3-O15 <sup>4</sup>               | 126.75(18) |
| Gd1-O29              | 2.425(5) | O1 <sup>2</sup> -Gd1-O11 <sup>1</sup>  | 95.80(17)  | O25-Gd3-O13                            | 71.98(18)  |
| Gd1-O23              | 2.508(5) | O1 <sup>2</sup> -Gd1-O23               | 66.38(18)  | O6 <sup>3</sup> -Gd3-O7                | 71.50(17)  |
| Gd1-O18 <sup>1</sup> | 2.392(5) | O1 <sup>2</sup> -Gd1-O30               | 126.15(17) | O6 <sup>3</sup> -Gd3-O25               | 71.61(19)  |
| Gd1-O30              | 2.478(5) | O31-Gd1-O12 <sup>1</sup>               | 125.12(17) | O6 <sup>3</sup> -Gd3-O14               | 148.1(2)   |
| Gd1-O24              | 2.412(5) | O31-Gd1-O1 <sup>2</sup>                | 136.09(19) | O6 <sup>3</sup> -Gd3-O5 <sup>3</sup>   | 52.17(17)  |
| Gd2-O9 <sup>5</sup>  | 2.493(6) | O31-Gd1-O11 <sup>1</sup>               | 75.11(17)  | O6 <sup>3</sup> -Gd3-O15 <sup>4</sup>  | 124.49(17) |
| Gd2-O28              | 2.394(7) | O31-Gd1-O23                            | 70.08(17)  | O6 <sup>3</sup> -Gd3-O16 <sup>4</sup>  | 120.03(17) |
| Gd2-O27              | 2.428(6) | O31-Gd1-O30                            | 73.59(18)  | O6 <sup>3</sup> -Gd3-O13               | 129.01(17) |
| Gd2-O21              | 2.423(5) | O29-Gd1-O12 <sup>1</sup>               | 80.56(17)  | O26-Gd3-O7                             | 78.41(18)  |
| Gd2-O20              | 2.297(6) | O29-Gd1-O1 <sup>2</sup>                | 71.88(18)  | O26-Gd3-O25                            | 144.9(2)   |
| Gd2-O22              | 2.438(5) | O29-Gd1-O31                            | 144.16(17) | O26-Gd3-O6 <sup>3</sup>                | 74.62(18)  |
| Gd2-O10 <sup>5</sup> | 2.498(5) | O29-Gd1-O11 <sup>1</sup>               | 132.17(17) | O26-Gd3-O14                            | 82.68(19)  |
| Gd2-O4 <sup>2</sup>  | 2.312(7) | O29-Gd1-O23                            | 134.20(17) | O26-Gd3-O5 <sup>3</sup>                | 79.68(17)  |
| Gd3-O7               | 2.404(5) | O29-Gd1-O30                            | 70.81(17)  | O26-Gd3-O15 <sup>4</sup>               | 81.03(18)  |
| Gd3-O25              | 2.407(5) | O23-Gd1-O11 <sup>1</sup>               | 71.36(17)  | O26-Gd3-O16 <sup>4</sup>               | 133.20(18) |
| Gd3-O6 <sup>3</sup>  | 2.401(5) | O18 <sup>1</sup> -Gd1-O12 <sup>1</sup> | 74.10(17)  | O26-Gd3-O13                            | 125.67(17) |
| Gd3-O26              | 2.341(5) | O18 <sup>1</sup> -Gd1-O1 <sup>2</sup>  | 141.20(18) | O14-Gd3-O5 <sup>3</sup>                | 144.62(17) |
| Gd3-O14              | 2.442(5) | O18 <sup>1</sup> -Gd1-O31              | 78.69(18)  | O14-Gd3-O15 <sup>4</sup>               | 72.10(18)  |
| Gd3-O5 <sup>3</sup>  | 2.607(5) | O18 <sup>1</sup> -Gd1-O11 <sup>1</sup> | 74.67(17)  | O14-Gd3-O13                            | 51.48(17)  |
| Gd3-O15 <sup>4</sup> | 2.531(5) | O18 <sup>1</sup> -Gd1-O29              | 86.77(18)  | O15 <sup>4</sup> -Gd3-O5 <sup>3</sup>  | 75.00(17)  |
| Gd3-O16 <sup>4</sup> | 2.406(5) | O18 <sup>1</sup> -Gd1-O23              | 138.44(17) | O15 <sup>4</sup> -Gd3-O13              | 105.79(17) |
| Gd3-O13              | 2.576(5) | O181-Gd1-O30                           | 72.37(17)  | O16 <sup>4</sup> -Gd3-O25              | 74.20(19)  |
| Ag2-N7               | 2.215(6) | O18 <sup>1</sup> -Gd1-O24              | 136.24(17) | O16 <sup>4</sup> -Gd3-O14              | 91.8(2)    |
| Ag2-N3               | 2.283(6) | O30-Gd1-O11 <sup>1</sup>               | 138.04(17) | O16 <sup>4</sup> -Gd3-O5 <sup>3</sup>  | 78.68(17)  |
| Ag2-N5               | 2.246(6) | O30-Gd1-O23                            | 121.33(18) | O16 <sup>4</sup> -Gd3-O15 <sup>4</sup> | 53.42(17)  |
| Ag3-N8               | 2.238(6) | O24-Gd1-O12 <sup>1</sup>               | 146.31(17) | O16 <sup>4</sup> -Gd3-O13              | 81.82(17)  |
| Ag3-N9               | 2.256(6) | O24-Gd1-O1 <sup>2</sup>                | 75.70(17)  | O13-Gd3-O5 <sup>3</sup>                | 154.64(16) |
| Ag3-N6               | 2.240(7) | O24-Gd1-O31                            | 82.12(18)  | O9 <sup>5</sup> -Gd2-O10 <sup>5</sup>  | 52.15(19)  |
| Ag1-N2               | 2.285(7) | O24-Gd1O11 <sup>1</sup>                | 136.48(18) | O28-Gd2-O9 <sup>5</sup>                | 72.4(3)    |
| Ag1-N10 <sup>6</sup> | 2.230(7) | O24-Gd1-O29                            | 86.37(17)  | O28-Gd2-O27                            | 74.9(3)    |
| Ag1-N1               | 2.418(7) | O24-Gd1-O23                            | 66.13(17)  | O28-Gd2-O21                            | 131.9(2)   |
| Ag1-N4               | 2.555(6) | O24-Gd1-O30                            | 64.56(17)  | O28-Gd2-O22                            | 68.1(2)    |
|                      |          | O7-Gd3-O25                             | 82.02(18)  | O28-Gd2-O10 <sup>5</sup>               | 68.4(2)    |
|                      |          | O7-Gd3-O14                             | 82.36(19)  | O27-Gd2-O9 <sup>5</sup>                | 132.7(2)   |
|                      |          | O7-Gd3-O5 <sup>3</sup>                 | 123.10(17) | O27-Gd2-O22                            | 75.94(19)  |
|                      |          | O7-Gd3-O15 <sup>4</sup>                | 148.95(17) | O27-Gd2-O10 <sup>5</sup>               | 84.4(2)    |
|                      |          | O7-Gd3-O16 <sup>4</sup>                | 147.05(17) | O21-Gd2-O9 <sup>5</sup>                | 148.1(2)   |

|                                      |            |                                       |          |                          |          |
|--------------------------------------|------------|---------------------------------------|----------|--------------------------|----------|
| O21-Gd2-O27                          | 78.6(2)    | O4 <sup>2</sup> -Gd2-O28              | 128.5(3) | N10 <sup>6</sup> -Ag1-N2 | 134.7(2) |
| O21-Gd2-O22                          | 66.91(17)  | O4 <sup>2</sup> -Gd2-O27              | 148.5(2) | N10 <sup>6</sup> -Ag1-N1 | 139.4(2) |
| O21-Gd2-O10 <sup>5</sup>             | 146.87(17) | O4 <sup>2</sup> Gd2-O21               | 70.0(2)  | N10 <sup>6</sup> -Ag1-N4 | 89.0(2)  |
| O20-Gd2-O9 <sup>5</sup>              | 106.4(2)   | O4 <sup>2</sup> -Gd2-O22              | 92.8(2)  | N1-Ag1-N4                | 85.4(2)  |
| O20-Gd2-O28                          | 138.7(3)   | O4 <sup>2</sup> -Gd2-O10 <sup>5</sup> | 121.8(2) |                          |          |
| O20-Gd2-O27                          | 77.8(2)    | N7-Ag2-N3                             | 123.2(2) |                          |          |
| O20-Gd2-O21                          | 70.06(19)  | N7-Ag2-N5                             | 125.5(2) |                          |          |
| O20-Gd2-O22                          | 132.9(2)   | N5-Ag2-N3                             | 107.2(2) |                          |          |
| O20-Gd2-O10 <sup>5</sup>             | 78.69(19)  | N8-Ag3-N9                             | 112.5(2) |                          |          |
| O20-Gd2-O4 <sup>2</sup>              | 89.8(3)    | N8-Ag3-N6                             | 122.0(2) |                          |          |
| O22-Gd2-O9 <sup>5</sup>              | 120.1(2)   | N6-Ag3-N9                             | 122.5(2) |                          |          |
| O22-Gd2-O10 <sup>5</sup>             | 135.52(17) | N2-Ag1-N1                             | 71.4(2)  |                          |          |
| O4 <sup>2</sup> -Gd2-O9 <sup>5</sup> | 78.4(2)    | N2-Ag1-N4                             | 133.0(2) |                          |          |

Symmetry transformations used to generate equivalent atoms: <sup>1</sup>2-X,-Y,2-Z; <sup>2</sup>1+X,-1+Y,+Z; <sup>3</sup>-X,1-Y,1-Z; <sup>4</sup>-X,-Y,1-Z; <sup>5</sup>+X,-1+Y,+Z; <sup>6</sup>+X,1+Y,+Z; <sup>7</sup>-1+X,1+Y,+Z
